# Supplementary material for: Transcriptome, Biochemical and Phenotypic Analysis of the Effects of a Precision Engineered Biostimulant for Inducing Salinity Stress Tolerance in Tomato
Source: MDPI journal article supplement (doi:10.3390/ijms24086988), 2023-04-10
Supplement: s1 [file s1]

# Transcriptome, Biochemical and Phenotypic Analysis of the Effects of a Precision Engineered Biostimulant for Inducing Salinity Stress Tolerance in Tomato

Elomofe Ikuyinminu <sup>1,2</sup>, Oscar Goñi <sup>1,2,\*</sup>, Łukasz Łangowski <sup>2</sup> and Shane O'Connell <sup>1,2</sup>

<sup>1</sup> Plant Biostimulant Group, Shannon Applied Biotechnology Centre,

Munster Technological University-Tralee (South Campus), Clash, V92 CX88 Tralee, Co. Kerry, Ireland

<sup>2</sup> Brandon Bioscience, V92 N6C8 Tralee, Co. Kerry, Ireland

\* Correspondence: oscar.goni@mtu.ie

## Supplementary Material

### 1 Supplementary Figures

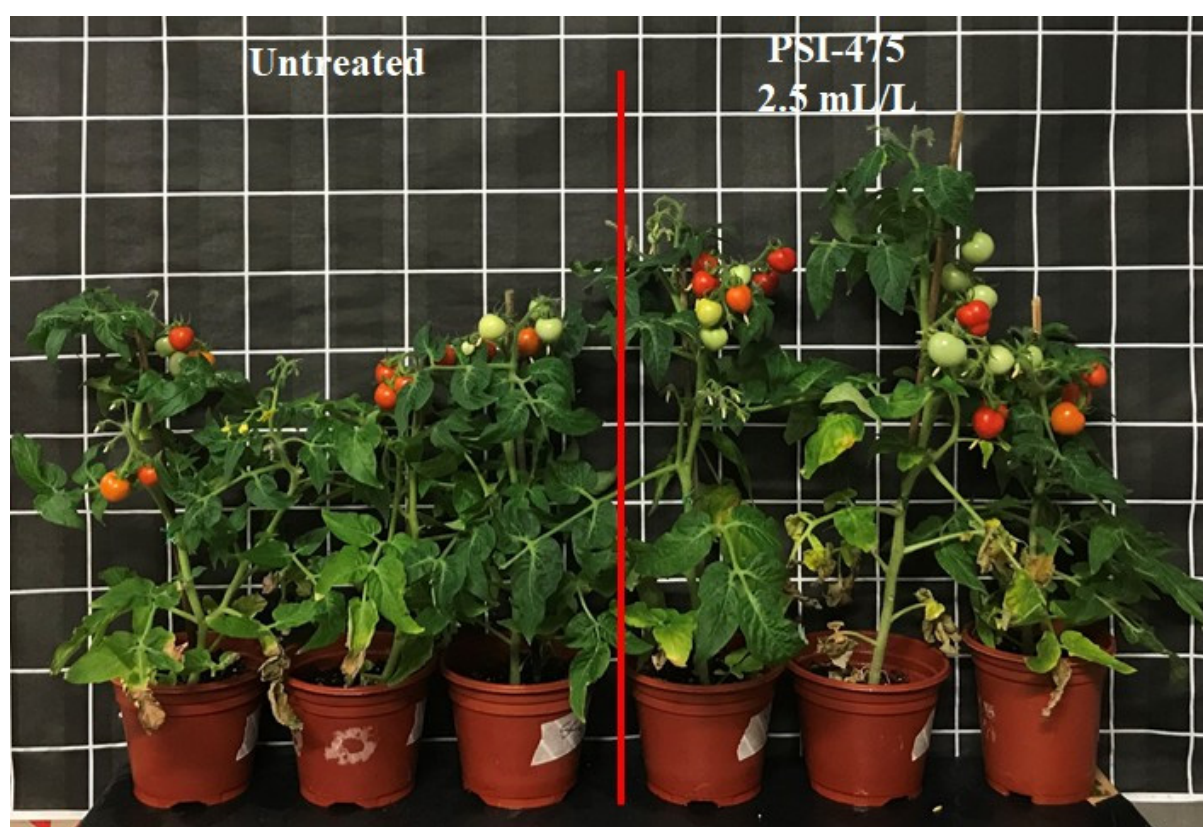

**Figure S1.** Pictures of the plants used to generate the transcriptomic data. Scale of background square equals 5 cm H X by 5 cm W.

## 2 Supplementary Tables

**Table S1.** Effect of salinity stress and PSI-475 on K<sup>+</sup>/Na<sup>+</sup> ratio in different tomato plant tissues.

| Source of variance              | Root   | Lower stem | Old leaf | Upper stem | Young leaf |
|---------------------------------|--------|------------|----------|------------|------------|
| <b>Salinity (S)</b>             |        |            |          |            |            |
| Unstressed                      | 1.66 b | 30.60 b    | 36.24 b  | 24.01 b    | 102.73 b   |
| Salinity stressed               | 0.51 a | 2.86 a     | 1.76a    | 2.21 a     | 1.32 a     |
| <b>PSI-475 (P)</b>              |        |            |          |            |            |
| Untreated                       | 0.62 a | 16.25      | 19.60 b  | 12.52      | 32.87 a    |
| PSI-475                         | 1.54 b | 17.21      | 18.40 a  | 13.70      | 71.19 b    |
| <b>S × P</b>                    |        |            |          |            |            |
| Unstressed × Untreated          | 0.81 c | 29.46      | 37.46 c  | 22.82      | 65.52 b    |
| Unstressed × PSI-475            | 2.51 d | 31.75      | 35.03 b  | 25.19      | 140.94 c   |
| Salinity stressed × Untreated   | 0.43 a | 3.05       | 1.74 a   | 2.21       | 1.22 a     |
| Salinity stressed × PSI-475     | 0.58 b | 2.67       | 1.78 a   | 2.21       | 1.43 a     |
| <b>Statistical significance</b> |        |            |          |            |            |
| <b>Salinity (S)</b>             | ***    | ***        | ***      | ***        | ***        |
| <b>PSI-475 (P)</b>              | ***    | ns         | ***      | ns         | *          |
| <b>S × P</b>                    | ***    | ns         | ***      | ns         | *          |

All data are expressed as average per sample collected at harvest sample points. ns, \*, and \*\*\* means non-significant or significant at  $p \leq 0.05$ , and  $p \leq 0.001$ , respectively. Different letters indicate statistical differences with  $p \leq 0.05$  based on t-test (S, P) or Tukey's HSD test (S × P). Number of biological replicates ( $n \geq 3$ ).

**Table S2.** Effect of salinity stress and PSI-475 on glucose content in different tomato plant tissues.

| Source of variance              | Root<br>(mg/g DW) | Lower stem<br>(mg/g DW) | Old leaf<br>(mg/g DW) | Upper stem<br>(mg/g DW) | Young leaf<br>(mg/g DW) |
|---------------------------------|-------------------|-------------------------|-----------------------|-------------------------|-------------------------|
| <b>Salinity (S)</b>             |                   |                         |                       |                         |                         |
| Unstressed                      | 0.24              | 0.79 b                  | 0.68 a                | 1.43 a                  | 0.80 a                  |
| Salinity stressed               | 0.30              | 0.56 a                  | 2.06 b                | 0.73 b                  | 1.78 b                  |
| <b>PSI-475 (P)</b>              |                   |                         |                       |                         |                         |
| Untreated                       | 0.21 a            | 0.32 a                  | 1.20 a                | 0.71 a                  | 0.98 a                  |
| PSI-475                         | 0.33 b            | 1.04 b                  | 1.55 b                | 1.45 b                  | 1.60 b                  |
| <b>S × P</b>                    |                   |                         |                       |                         |                         |
| Unstressed × Untreated          | 0.16              | 0.24 a                  | 0.54                  | 0.48 a                  | 0.70                    |
| Unstressed × PSI-475            | 0.32              | 1.35 c                  | 0.83                  | 2.37 b                  | 0.90                    |
| Salinity stressed × Untreated   | 0.25              | 0.40 a                  | 1.86                  | 0.93 a                  | 1.26                    |
| Salinity stressed × PSI-475     | 0.34              | 0.73 b                  | 2.26                  | 0.53 a                  | 2.31                    |
| <b>Statistical significance</b> |                   |                         |                       |                         |                         |
| <b>Salinity (S)</b>             | ns                | *                       | ***                   | **                      | ***                     |
| <b>PSI-475 (P)</b>              | *                 | ***                     | ***                   | **                      | *                       |
| <b>S × P</b>                    | ns                | ***                     | ns                    | ***                     | ns                      |

All data are expressed as average per sample collected at harvest sample points. ns, \*, \*\*, and \*\*\* means non-significant or significant at  $p \leq 0.05$ ,  $p \leq 0.01$ , and  $p \leq 0.001$ , respectively. Different letters indicate statistical differences with  $p \leq 0.05$  based on t-test (S, P) or Tukey's HSD test (S × P). Number of biological replicates ( $n \geq 3$ ).

**Table S3.** Effect of salinity stress and PSI-475 on fructose content in different tomato plant tissues.

| Source of variance              | Root<br>(mg/g DW) | Lower stem<br>(mg/g DW) | Old leaf<br>(mg/g DW) | Upper stem<br>(mg/g DW) | Young leaf<br>(mg/g DW) |
|---------------------------------|-------------------|-------------------------|-----------------------|-------------------------|-------------------------|
| <b>Salinity (S)</b>             |                   |                         |                       |                         |                         |
| Unstressed                      | 0.50              | 0.75                    | 1.01 a                | 1.36 b                  | 1.25 a                  |
| Salinity stressed               | 0.47              | 0.89                    | 4.76 b                | 0.87 a                  | 2.45 b                  |
| <b>PSI-475 (P)</b>              |                   |                         |                       |                         |                         |
| Untreated                       | 0.35 a            | 0.50 a                  | 2.63                  | 0.69 a                  | 1.17 a                  |
| PSI-475                         | 0.62 b            | 1.14 b                  | 3.15                  | 1.54 b                  | 2.53 b                  |
| <b>S × P</b>                    |                   |                         |                       |                         |                         |
| Unstressed × Untreated          | 0.27 a            | 0.26 a                  | 0.73                  | 0.46 a                  | 0.82 a                  |
| Unstressed × PSI-475            | 0.72 b            | 1.24 c                  | 1.29                  | 2.26 c                  | 1.68 b                  |
| Salinity stressed × Untreated   | 0.42 a            | 0.74 b                  | 4.52                  | 0.91 b                  | 1.53 ab                 |
| Salinity stressed × PSI-475     | 0.51 ab           | 1.04 bc                 | 5.00                  | 0.82 b                  | 3.38 c                  |
| <b>Statistical significance</b> |                   |                         |                       |                         |                         |
| <b>Salinity (S)</b>             | <b>ns</b>         | <b>ns</b>               | <b>***</b>            | <b>***</b>              | <b>***</b>              |
| <b>PSI-475 (P)</b>              | <b>**</b>         | <b>***</b>              | <b>ns</b>             | <b>***</b>              | <b>***</b>              |
| <b>S × P</b>                    | <b>*</b>          | <b>**</b>               | <b>ns</b>             | <b>***</b>              | <b>*</b>                |

All data are expressed as average per sample collected at harvest sample points. ns, \*, \*\*, and \*\*\* means non-significant or significant at  $p \leq 0.05$ ,  $p \leq 0.01$ , and  $p \leq 0.001$ , respectively. Different letters indicate statistical differences with  $p \leq 0.05$  based on t- test (S, P) or Tukey's HSD test (S × P). Number of biological replicates ( $n \geq 3$ ).

**Table S4.** Effect of salinity stress and PSI-475 on soluble protein content in different tomato plant tissues.

| Source of variance              | Root (mg/g DW) | Lower stem<br>(mg/g DW) | Old leaf<br>(mg/g DW) | Upper stem<br>(mg/g DW) | Young leaf<br>(mg/g DW) |
|---------------------------------|----------------|-------------------------|-----------------------|-------------------------|-------------------------|
| <b>Salinity (S)</b>             |                |                         |                       |                         |                         |
| Unstressed                      | 17.11 b        | 8.24                    | 20.52 b               | 10.60                   | 43.91                   |
| Salinity stressed               | 10.76 a        | 7.79                    | 14.01 a               | 9.02                    | 42.44                   |
| <b>PSI-475 (P)</b>              |                |                         |                       |                         |                         |
| Untreated                       | 13.33          | 7.44                    | 18.93 b               | 9.60                    | 39.80 a                 |
| PSI-475                         | 14.55          | 8.60                    | 15.61 a               | 10.03                   | 46.54 b                 |
| <b>S × P</b>                    |                |                         |                       |                         |                         |
| Unstressed × Untreated          | 16.87          | 7.31                    | 20.04 c               | 10.99                   | 41.61                   |
| Unstressed × PSI-475            | 17.37          | 9.18                    | 21.01 c               | 10.22                   | 46.20                   |
| Salinity stressed × Untreated   | 9.79           | 7.58                    | 17.82 b               | 8.21                    | 37.99                   |
| Salinity stressed × PSI-475     | 11.73          | 8.01                    | 10.21 a               | 9.36                    | 46.88                   |
| <b>Statistical significance</b> |                |                         |                       |                         |                         |
| <b>Salinity (S)</b>             | <b>***</b>     | <b>ns</b>               | <b>***</b>            | <b>ns</b>               | <b>ns</b>               |
| <b>PSI-475 (P)</b>              | <b>ns</b>      | <b>ns</b>               | <b>***</b>            | <b>ns</b>               | <b>***</b>              |
| <b>S × P</b>                    | <b>ns</b>      | <b>ns</b>               | <b>***</b>            | <b>ns</b>               | <b>ns</b>               |

All data are expressed as average per sample collected at harvest sample points. ns and \*\*\* means non-significant or significant  $p \leq 0.001$ . Different letters indicate statistical differences with  $p \leq 0.05$  based on t- test (S, P) or Tukey's HSD test (S × P). Number of biological replicates ( $n \geq 3$ ).

**Table S5.** RNA-seq QC data summary in young leaf and root tissue samples of salinity stressed tomato plants.

| Sample name <sup>1</sup> | Raw reads <sup>2</sup> | Clean reads <sup>3</sup> | Error rate (%) <sup>4</sup> | Q20 (%) <sup>5</sup> | Q30 (%) <sup>6</sup> | GC content (%) <sup>7</sup> |
|--------------------------|------------------------|--------------------------|-----------------------------|----------------------|----------------------|-----------------------------|
| LeafTrt2                 | 28,233,239             | 27,758,977               | 0.02                        | 98.56                | 95.47                | 42.79                       |
| LeafTrt3                 | 25,557,968             | 25,230,307               | 0.02                        | 98.66                | 95.70                | 42.74                       |
| LeafTrt1                 | 27,191,658             | 26,799,960               | 0.02                        | 98.68                | 95.75                | 43.06                       |
| RootTrt2                 | 21,395,116             | 20,865,057               | 0.02                        | 98.65                | 95.64                | 42.34                       |
| RootTrt3                 | 25,815,340             | 25,134,755               | 0.02                        | 98.52                | 95.32                | 42.48                       |
| RootTrt1                 | 22,280,918             | 21,782,527               | 0.02                        | 98.61                | 95.50                | 42.34                       |
| LeafCtr3                 | 23,909,857             | 23,588,287               | 0.02                        | 98.64                | 95.67                | 42.86                       |
| LeafCtr2                 | 22,323,457             | 21,922,394               | 0.02                        | 98.54                | 95.42                | 42.65                       |
| LeafCtr1                 | 24,066,624             | 23,750,535               | 0.02                        | 98.56                | 95.49                | 42.58                       |
| RootCtr3                 | 23,636,644             | 23,136,802               | 0.02                        | 98.62                | 95.58                | 42.20                       |
| RootCtr2                 | 23,023,155             | 22,730,435               | 0.02                        | 98.51                | 95.32                | 42.17                       |
| RootCtr1                 | 21,560,363             | 21,210,996               | 0.02                        | 98.50                | 95.27                | 42.14                       |

<sup>1</sup> “Trt” and “Ctr” correspond to treated with PSI-475 and control samples.

<sup>2</sup> Reads count from the raw data, four rows as a unit, with statistics of reads count for every sequencing.

<sup>3</sup> Reads count filtered from raw data. Statistics method is similar with raw reads. All the following analysis is based on clean data.

<sup>4</sup> Base error rate of whole sequencing.

<sup>5</sup> The percentage of the bases whose Q Phred values is greater than 20 (99% correct rate).

<sup>6</sup> The percentage of the bases whose Q Phred values is greater than 30 (99.9% correct rate).

<sup>7</sup> The percentage of G&C base numbers of total bases.

**Table S6.** Primers sequences used for qRT-PCR analysis in tomato

| Gene                              | Primer Forward       | Primer Reverse         |
|-----------------------------------|----------------------|------------------------|
| <i>TIP41 (Soly07g025390.4)</i>    | CTCGACCAAGTCCCTACGAT | TGAAAAGCTTGCGACACTCG   |
| <i>NHX4 (Soly01g098190.3)</i>     | TGGGAGCAATTTACGACGA  | TTCCAGCGCCTTTACCAAT    |
| <i>SPS (Soly09g092130.3.1)</i>    | AAAACGCCGTCAAGAACGTG | GCAATCGGCCCTCTGGTACTT  |
| <i>PDH (Soly02g089630.3.1)</i>    | GGTTTTTCGTGACCTCCGAC | AGAACCATAGTTGCCGGTGA   |
| <i>CHL (Soly03g115980.1)</i>      | TGGCCAACATACAAGGTGCT | AATGGGGTTTCTGGTGCAA    |
| <i>TAS14 (Soly02g084850.3)</i>    | TGCCTGGACAACATGAAGGT | GCGTCAGCACACTTTACACG   |
| <i>HSP101 (Soly03g115230.3.1)</i> | ACCCGATCAGATTGCGGAAG | GAACCAGTTGGTTGCTGTGG   |
| <i>GS1 (Soly04g014510.3.1)</i>    | ATCGCGGAGACTACCATCCT | AGGTCATGTGAGGAAAGGGC   |
| <i>AKT2/3 (Soly01g104030.3.1)</i> | CGGAGACGCTCAAGGAAGAA | TGCATCCATGTCTAAGAAGCAC |
| <i>PIP2.1 (Soly10g084120.2.1)</i> | CAGCTGGCATTCTGGTGGA  | CAGCACCTAATCCAGTGGCTA  |
| <i>POR2 (Soly07g054210.3.1)</i>   | GCTGCATTGCTGAACTGGT  | TCTCTGCATCACTGGCTTCC   |
| <i>HKT1;2 (Soly07g014680.3)</i>   | CCTACCGTCTTTTCGTCTCA | AGGTAAAAGCTTCCCCACCA   |
